# Supplementary material
Source: PubMed Central journal article supplement (PMC4495354)
Supplement: cdd2014214x6.pdf [file cdd2014214x6.pdf]

## Supplementary tables

Supplementary Table I. RNA interference oligo sequences

| Oligo           | Sequence                                                        |
|-----------------|-----------------------------------------------------------------|
| Scrambled-      | 5' UAGCCACCACUGACGACCUdTdT 3'<br>5' dTdT AUCGGUGGUGACUGCUGGA 3' |
| TAp73i          | 5' CGGAUUCCAGCAUGGACGUdTdT 3'<br>5' dTdT GCCUAAGGUCGUACCUGCA 3' |
| p73i.4-         | 5' CCAUCCUGUACAACUUCAUGU G 3'<br>5' CAUGAAGUUGUACAGGAUGGU G 3'  |
| $\Delta$ Np73i- | 5' CGUCGGUGACCCCGCACGGUU 3'<br>5' CCGUGCGGGGUCACCGACGUU 3'      |

Supplementary Table II. qRT-PCR primer sequences.

| Gene                     | Forward                | Reverse                 |
|--------------------------|------------------------|-------------------------|
| <b>Mouse</b>             |                        |                         |
| mVEGFA                   | GCGGATCAAACCTCACAAA    | TTCACATCGGCTGTGCTGTAGGA |
| mTGF $\beta$ 1           | TGGAGCAACATGTGGAAGCTC  | ACGCCAGGAATTGTTGCTAT    |
| mTGF $\beta$ R1          | TCTGCATTGCACTTAATGCTGA | AAAGGGCGATCTAGTGATGGA   |
| mALK1                    | GGGCCTTTTIGATGCTGTCG   | TGGCAGAATGGTCTCTTGACAG  |
| mID1                     | GGCTGCTACTCACGCCTCAA   | GATCGTCGGCTGGAACAC      |
| mTAp73 $\alpha$          | GCACCTACTTTGACCTCCCC   | GCACTGCTGAGCAAATTGAAC   |
| m $\Delta$ Np73 $\alpha$ | ATGCTTTACGTCGGTGACCC   | GCACTGCTGAGCAAATTGAAC   |
| mCD31                    | TACTGCAGGCATCGGCAAA    | GCATTCGCACACCTGGAT      |
| mVEGFR1                  | GGGCAGACTCTGTGCTCAACT  | CAGCTCATTGACCCCTCGT     |
| mVEGFR2                  | ACAGACCCGGCCAAACAA     | TTCCCCCTGGAAATCCCTC     |
| mVE-Cadherin             | AGGACAGCAACTTCACCCCTCA | AACTGCCCATACTTGACCGTG   |
| m18S                     | AGTTCCAGCACATTTTGCAG   | TCATCCTCCGTGAGTTCTCCA   |
| <b>Human</b>             |                        |                         |
| hTAp73                   | GCACCTACTTCGACCTTCCC   | GTGCTGCTCAGCAGATTGAAC   |
| h $\Delta$ Np73          | ATGCTGTACGTCGGTGACCC   | GTGCTGCTCAGCAGATTGAAC   |
| hVEGFA                   | AAGGAGGAGGGCAGAATCA    | GCAGTAGCTGCGCTGATAGA    |
| hTGF $\beta$ 1           | CTAATGGTGGAAACCCACAACG | TATCGCCAGGAATTGTTGCTG   |
| hALK1                    | CGAGGGATGAACAGTCCTGG   | GTCATGTCTGAGGCGATGAAG   |
| hID1                     | CTGCTCTACGACATGAACGG   | GAAGGTCCCTGATGTAGTCGAT  |
| h18S                     | GGCGCCCCCTCGATGCTCTTA  | GCTCGGGCCTGCTTTGAACAC   |
