# Supplementary material
Source: PubMed Central journal article supplement (PMC4495354)

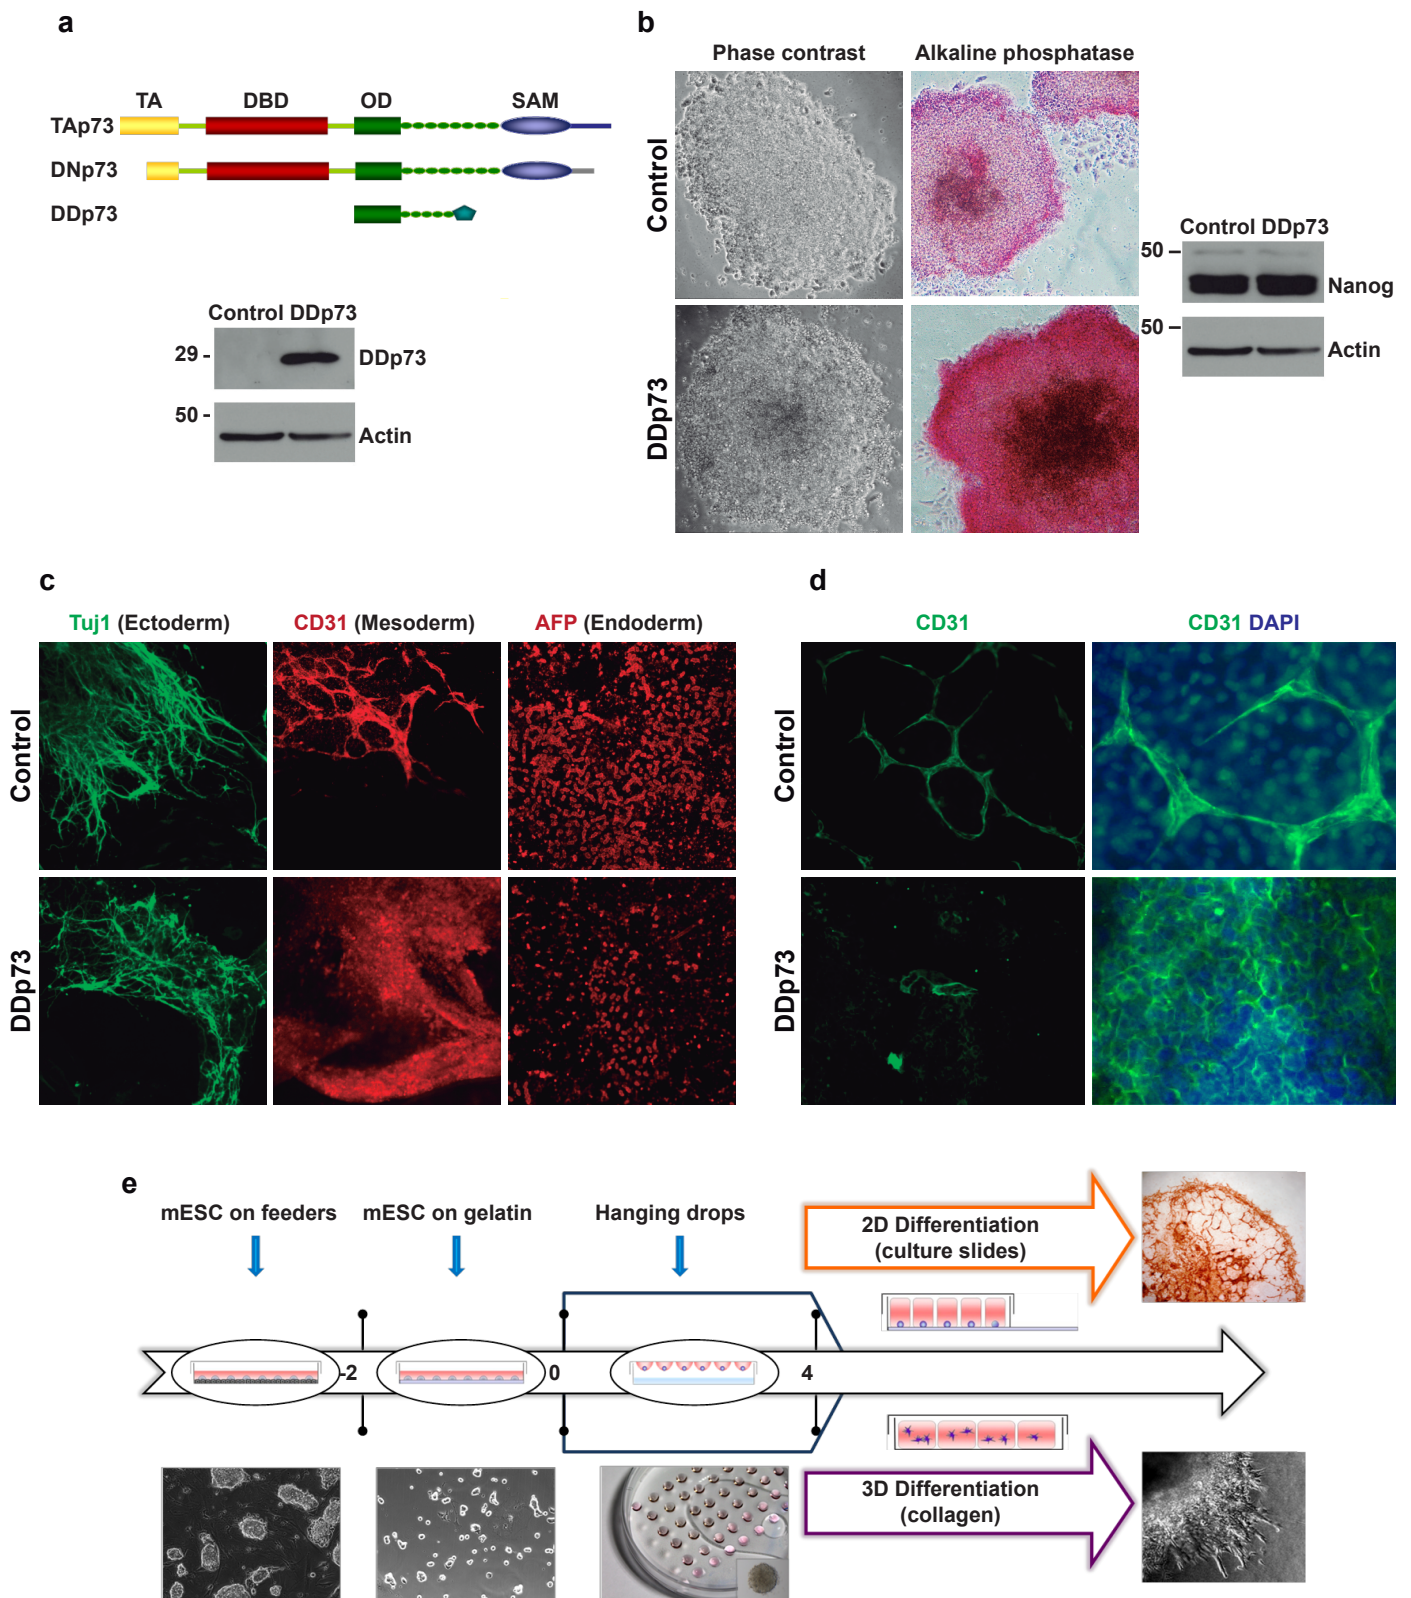

Supplementary 1. Fernandez-Alonso, R. et al.

Supplement: cdd2014214x1.pdf [file cdd2014214x1.pdf]

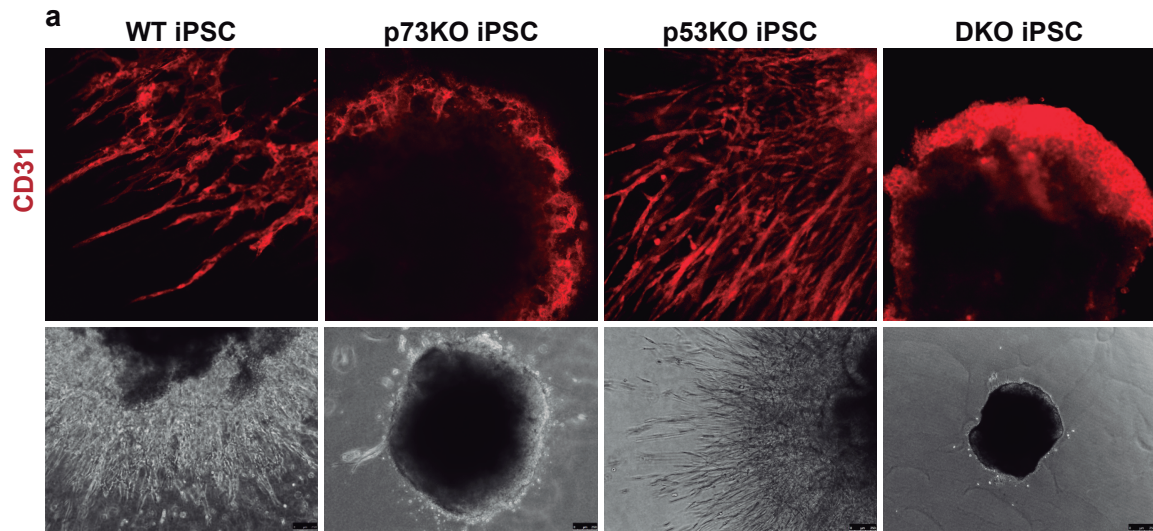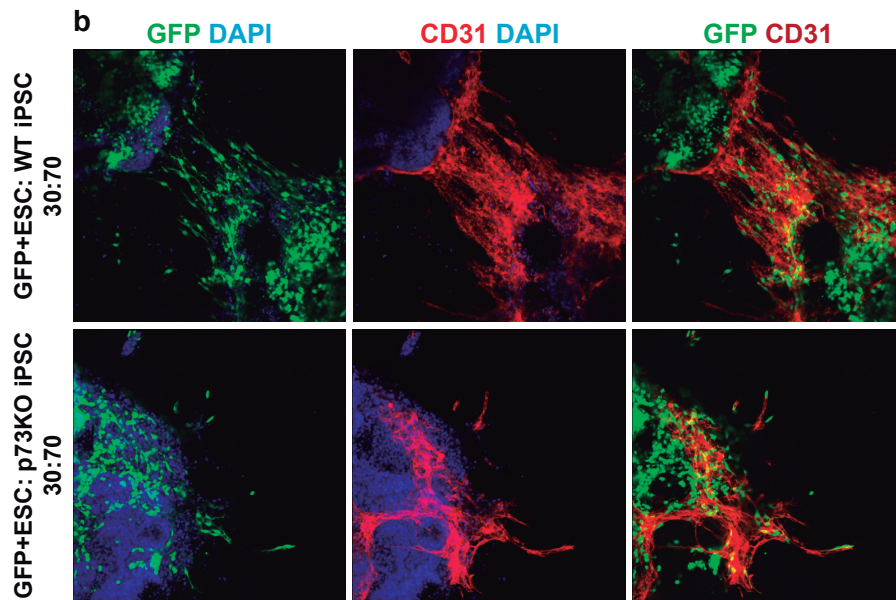

Supplement: cdd2014214x2.pdf [file cdd2014214x2.pdf]

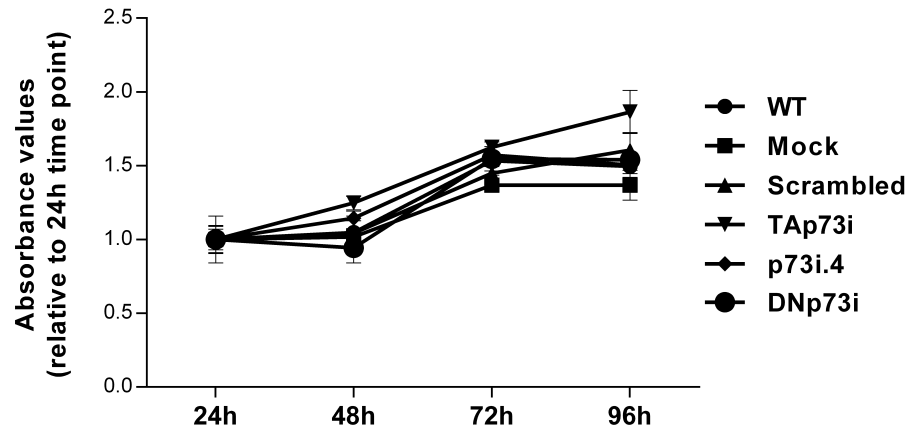

Supplementary 3. Fernandez-Alonso, R. et al.

Supplement: cdd2014214x3.pdf [file cdd2014214x3.pdf]

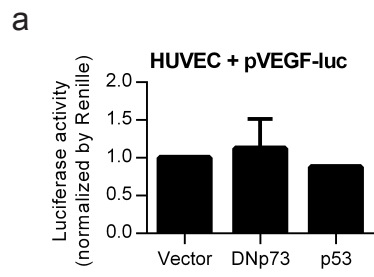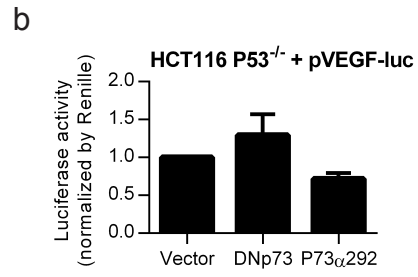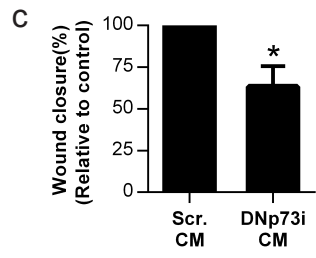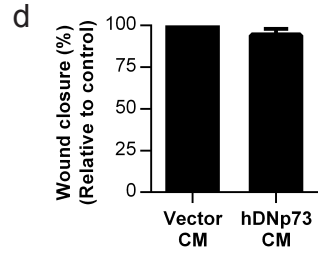

Supplement: cdd2014214x4.pdf [file cdd2014214x4.pdf]
